# Supplementary material for: A UOx@HMnO2 biozyme–nanozyme driven electrochemical platform for specific uric acid bioassays
Source: Royal Society of Chemistry journal article supplement (doi:10.1039/d4an01512f), 2025-01-01
Supplement: d4an01512f1.pdf [file d4an01512f1.pdf]

## Electronic Supporting Information

UOx@HMnO<sub>2</sub> Biozyme-Nanozyme Driven Electrochemical Platform for Specific Uric Acid Bioassays

Chenlong He<sup>a,1</sup>, Huawei Liu<sup>a,1</sup>, Ming Yin<sup>a</sup>, Jing Chen<sup>a</sup>, Wensi Huang<sup>b</sup>, Han Zhou<sup>a</sup>, Shengming Wu<sup>a</sup>, Yilong Wang<sup>a,\*</sup>

a State Key Laboratory of Cardiology and Medical Innovation Center, Shanghai East Hospital, The Institute for Biomedical Engineering & Nano Science, School of Medicine, Tongji University, Shanghai, 200092, P. R. China.

b School of Biomedical Engineering, Shanghai Jiao Tong University, Shanghai, 200030, P.R. China.

\*Corresponding author: yilongwang@tongji.edu.cn

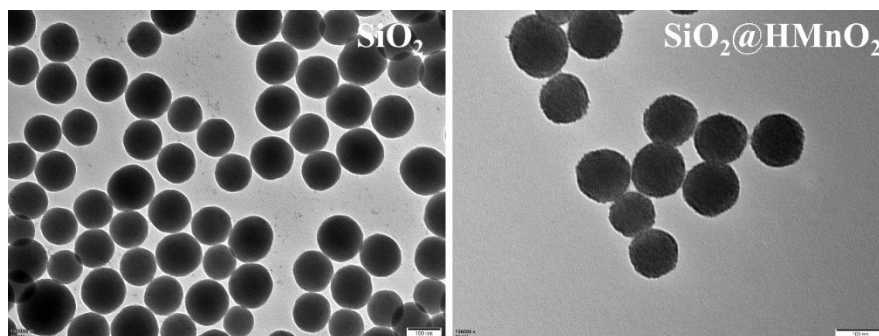

Fig S1. TEM image of  $\text{SiO}_2$  nanoparticles and  $\text{SiO}_2@MnO_2$  nanoparticles.

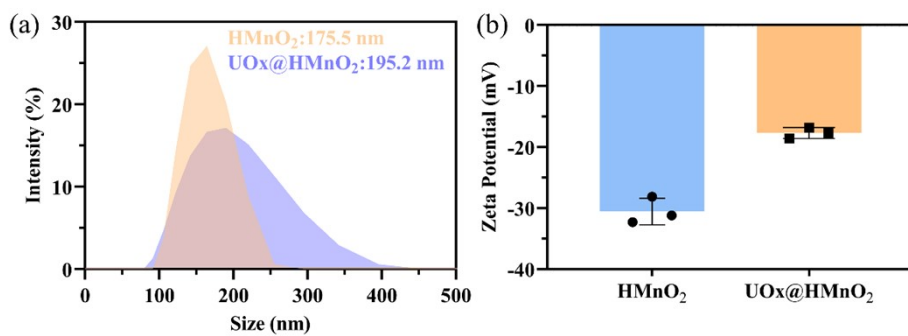

Fig S2. (a) Size distributions and (b) Zeta potential of HMnO<sub>2</sub> and UOx@HMnO<sub>2</sub>.

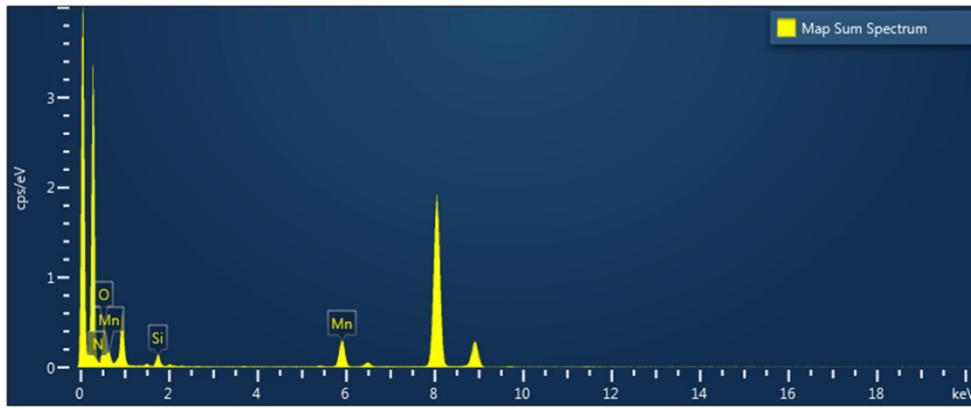

Fig S3. EDS spectrum of UO<sub>x</sub>@HMnO<sub>2</sub> by STEM.

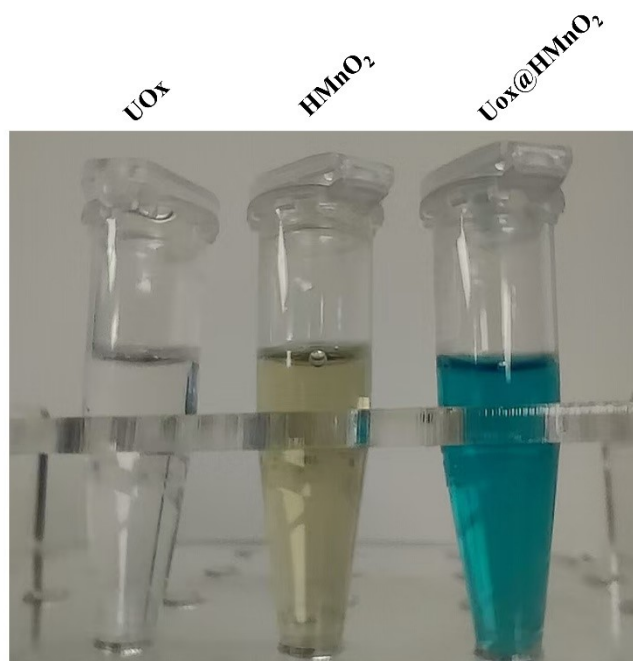

Fig S4. Photographs for the chromogenic reaction of TMB catalyzed by the UOx@HMnO<sub>2</sub>.

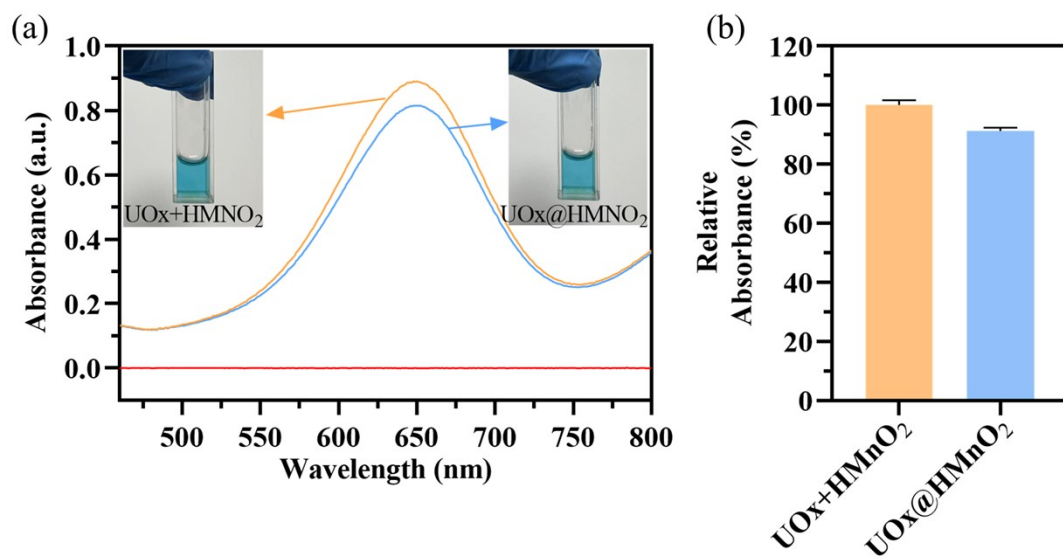

Fig. S5. (a) Comparison of the TMB color development of UOx@HMnO<sub>2</sub> with equal amounts of free UOx. (b) UV absorption of UOx@HMnO<sub>2</sub> vs. equal amounts of free uric acid oxidase at OD650.

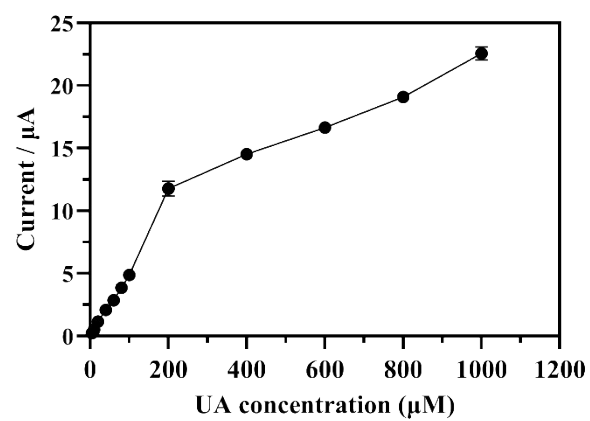

Fig S6. Relationship between UA concentration and current.

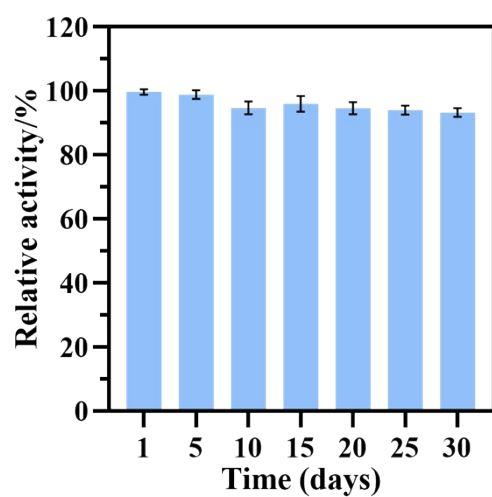

Fig. S7. UOx@HMnO<sub>2</sub>-GCE was used for the long-term detection of uric acid stability, and the vertical coordinate was calculated using the CV value on day 1 as a reference.



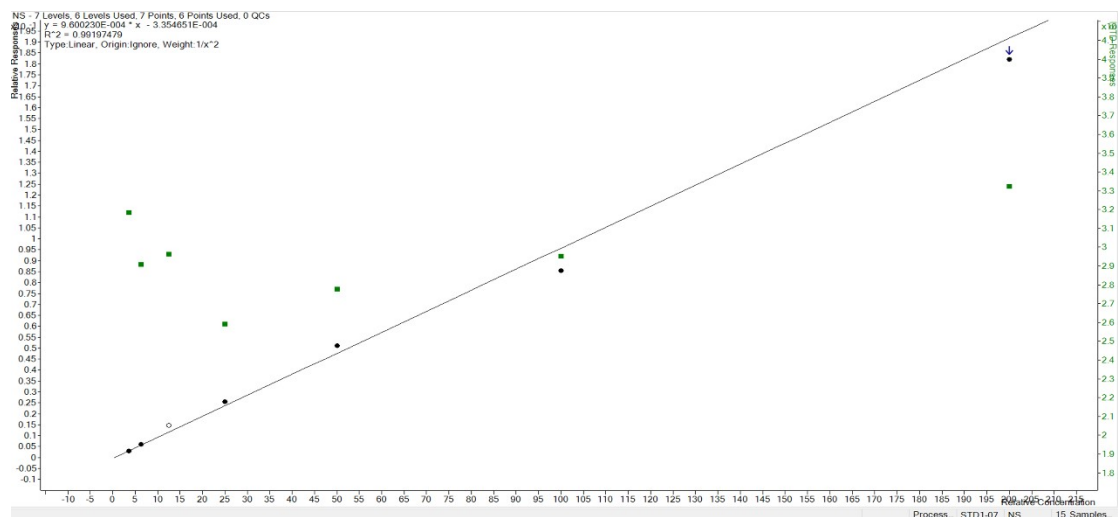

Fig S8. Data points and standard curves for high performance liquid chromatography-tandem mass spectrometry (UHPLC-MS/MS) tests.

Table S1. Recoveries of UA in human urine based on the UOx@HMnO<sub>2</sub>-GCE.

| Before amount ( $\mu\text{M}$ ) | Add amount ( $\mu\text{M}$ ) | Found amount ( $\mu\text{M}$ ) | Recovery (%) |
|---------------------------------|------------------------------|--------------------------------|--------------|
| 32.80                           | 10                           | 41.09                          | 96.00        |
| 34.22                           | 20                           | 66.32                          | 103.27       |
| 33.24                           | 40                           | 74.87                          | 102.22       |
